# Patient-specific Quality Assurance Failure Prediction with Deep Tabular Models

R. Levin \*, A. Y. Aravkin, M. Kim  
University of Washington, Seattle WA

## Abstract

**Background:** Patient-specific quality assurance (PSQA) is part of the standard practice to ensure that a patient receives the dose from intensity-modulated radiotherapy (IMRT) beams as planned in the treatment planning system (TPS). PSQA failures can cause a delay in patient care and increase workload and stress of staff members. A large body of previous work for PSQA failure prediction focuses on non-learned plan complexity measures. Another prominent line of work uses machine learning methods, often in conjunction with feature engineering. Currently, there are no machine learning solutions which work directly with multi-leaf collimator (MLC) leaf positions, providing an opportunity to improve leaf sequencing algorithms using these techniques.

**Purpose:** To improve patient safety and work efficiency, we develop a tabular transformer model based directly on the MLC leaf positions (without any feature engineering) to predict IMRT PSQA failure. This neural model provides an end-to-end differentiable map from MLC leaf positions to the probability of PSQA plan failure, which could be useful for regularizing gradient-based leaf sequencing optimization algorithms and generating a plan that is more likely to pass PSQA.

**Method:** We retrospectively collected DICOM RT PLAN files of 968 patient plans treated with volumetric arc therapy. We construct a beam-level tabular dataset with 1873 beams as samples and MLC leaf positions as features. We train an attention-based neural network FT-Transformer to predict the ArcCheck-based PSQA gamma pass rates. In addition to the regression task, we evaluate the model in the binary classification context predicting the pass or fail of PSQA. The performance was compared to the results of the two leading tree ensemble methods (CatBoost and XGBoost) and a non-learned method based on mean MLC gap.

**Results:** The FT-Transformer model achieves 1.44% Mean Absolute Error (MAE) in the regression task of the gamma pass rate prediction and performs on par with XGBoost (1.53 % MAE) and CatBoost (1.40 % MAE). In the binary classification task of PSQA failure prediction, FT-Transformer achieves 0.85 ROC AUC (with CatBoost and XGBoost achieving 0.87 ROC AUC and the mean-MLC-gap complexity metric achieving 0.72 ROC AUC). Moreover, FT-Transformer, CatBoost, and XGBoost all achieve 80% true positive rate while keeping the false positive rate under 20%.

**Conclusions:** We demonstrate that reliable PSQA failure predictors can be successfully developed based solely on MLC leaf positions. Our FT-Transformer neural network can reduce the need for patient rescheduling due to PSQA failures by 80% while sending only 20% of plans that would not have failed the PSQA for replanning. FT-Transformer achieves comparable performance with the leading tree ensemble methods

---

\*This paper was written prior to the author joining Amazon

41 while having an additional benefit of providing an end-to-end differentiable map from  
42 MLC leaf positions to the probability of PSQA failure.

|    |                                                               |           |
|----|---------------------------------------------------------------|-----------|
| 43 | <b>Contents</b>                                               |           |
| 44 | <b>I. Introduction</b>                                        | <b>1</b>  |
| 45 | <b>II. Methods</b>                                            | <b>3</b>  |
| 46 | II.A. Data Description . . . . .                              | 3         |
| 47 | II.B. Transformer-based tabular deep learning model . . . . . | 4         |
| 48 | <b>III. Results</b>                                           | <b>5</b>  |
| 49 | <b>IV. Discussion</b>                                         | <b>7</b>  |
| 50 | <b>V. Conclusion</b>                                          | <b>8</b>  |
| 51 | <b>VI. Conflict of Interest Statement</b>                     | <b>8</b>  |
| 52 | <b>References</b>                                             | <b>9</b>  |
| 53 | <b>A Hyperparameter search spaces</b>                         | <b>16</b> |
| 54 | A.1. FT-Transformer . . . . .                                 | 16        |
| 55 | A.2. Catboost . . . . .                                       | 16        |
| 56 | A.3. XGBoost . . . . .                                        | 16        |

## 1. Introduction

Intensity-modulated radiation therapy (IMRT)<sup>1</sup> achieves a dose distribution that is highly conformal to the target while minimizing the dose to normal tissue by modulating beam intensities within the radiation fields, often termed fluence maps. The beam modulation is performed using multi-leaf collimators (MLC) located within the gantry of a linear accelerator by varying the speed and position of each leaf and gantry angle.

Leaf sequencing algorithms<sup>2,3,4,5,6,7,8</sup> in the treatment planning system (TPS) optimize the MLC movements to deliver a desirable dose distribution as a treatment planer specifies. Ultimately, final dose distributions to patients are computed using the optimal leaf sequences.

IMRT delivery is a complex, multi-step process with a number of possible sources of noise ranging from computational approximations in the underlying algorithms to physical effects in the linear accelerator components. Therefore, an extensive quality assurance (QA) process is required to prevent any unintended error from reaching the patient and affecting the patient's clinical outcome. It is current practice in many clinics to perform a patient-specific QA (PSQA) for each patient's radiation treatment plan<sup>9,10,11</sup> to ensure that the linear accelerator delivers the correct dose distributions as designed and shown by TPS.

One of the prevalent ways to perform PSQA is using a 3D phantom with an embedded array of detectors to measure the dose delivered using the patient's treatment beams. Then the computed dose distribution in the TPS is compared with the measured dose distribution, and a gamma analysis is performed to quantify the agreement between the two<sup>12,13</sup>. Sometimes, PSQA fails due to a poor agreement between the computed and measured dose distributions requiring a replanning process and another PSQA, which is often done outside clinic hours. PSQA failure can cause increased workloads and stress for hospital staff members, delay patient treatment, or compromise patient safety if the work has to be rushed to preserve the patient's original treatment schedule.

To mitigate those issues and improve patient safety, many studies explored PSQA failure prediction. An extensive line of research focused on developing non-learned treatment plan complexity metrics such as modulation complexity score, mean aperture displacement, or small aperture score and investigating their correlation with PSQA failure<sup>14,15,16,17,18,19,20</sup>. A large number of papers further extended these approaches by developing classical machine

87 learning and deep learning models to predict the PSQA failure based on a vast array of the  
88 plan complexity metrics as well as other heuristic features<sup>21,22,23,24,25,26,27,28</sup>. Thongsawad et  
89 al. used MLC texture analysis and boosting algorithms for predicting gamma evaluation  
90 results<sup>29</sup>. Kimura *et al.* and Huang *et al.* used target metrics alternative to gamma pass  
91 rates, such as dose difference<sup>30,31</sup>. Other works leveraged convolutional neural networks to  
92 predict the PSQA failure directly from fluence maps<sup>32</sup> or dose distributions<sup>33,34</sup> obtained  
93 from TPS. Since these previous efforts leveraged heuristic feature engineering, their models  
94 are not differentiable and are unable to provide a differentiable map from MLC leaf positions  
95 to the probability of PSQA plan failure. This means that their models are not applicable to  
96 be directly used in the leaf sequencing algorithms to produce MLC positions that are likely  
97 to pass PSQA.

98 In this study, we develop a tabular transformer neural network model FT-Transformer<sup>35</sup>  
99 based directly on MLC leaf positions to predict volumetric arc therapy (VMAT) PSQA  
100 failure. Using 968 patient plans previously treated with 2–4 VMAT arcs, we trained a  
101 regression model to predict the ArcCheck-based PSQA gamma pass rates. We evaluated  
102 our model in both the regression context and additionally in the classification context of  
103 predicting the pass or fail of PSQA by directly computing receiver operating characteristic  
104 (ROC) area under the curve (AUC) on the regression predictions.

105 We compared the performance of our model with the results from two leading gradient  
106 boosted decision tree models in their CatBoost and XGBoost implementations<sup>36,37</sup> widely  
107 used for tabular data as well as to a non-learned complexity metric, mean MLC gap.

108 Neither FT-Transformer nor CatBoost have been used in the context of PSQA failure  
109 prediction. Our proposed approach is distinguished from the previous efforts in that we  
110 predict PSQA failure directly from MLC leaf positions and the FT-Transformer model we  
111 applied is end-to-end differentiable with no heuristic feature engineering. As the MLC leaf  
112 positions are the output of leaf sequencing optimization algorithms, our model could be  
113 directly leveraged as a differentiable regularizer to improve the leaf sequencing algorithms  
114 to produce deliverable treatment plans (i.e., plans with a lower chance of PSQA failure).  
115 This is especially useful for the algorithms that employ gradient-based optimization, some  
116 of which are implemented in commercial TPS<sup>4,8</sup>.

## 117 II. Methods

118 In this section, we describe the pipeline of our study including the description of data col-  
119 lection and processing as well as the models, evaluation metrics and hyperparameter tuning  
120 approaches we use. This study was approved by the institutional review board of the Uni-  
121 versity of Washington (STUDY00015736).

### 122 II.A. Data Description

123 We retrospectively collected DICOM-RT PLAN<sup>38</sup> files of 968 patients previously treated  
124 with 2 – 4 VMAT arcs using Elekta linear accelerators with Agility collimators between  
125 January 2019 and August 2021. All plans were designed in Raystation TPS\*. PSQA of each  
126 plan was done using ArcCHECK<sup>†</sup> and the gamma analysis of each PSQA used the criteria of  
127 3% dose difference and 3 mm distance-to-agreement (3%/3mm). We excluded stereotactic  
128 body radiotherapy (SBRT) patients since our clinic applies different criteria for the gamma  
129 analysis with SBRT patients. We constructed a tabular dataset on beam level leveraging  
130 the DICOM-RT PLAN<sup>38</sup> files of the treatment plans to form the samples: for each arc in a  
131 treatment plan, we used the leaf and jaw positions of the MLC collimators at each gantry  
132 angle.

133 We aggregated the MLC positions by computing the MLC gap for each leaf-jaw pair at  
134 every gantry angle and averaging every 10 neighboring MLC pairs. Additionally, we averaged  
135 the gantry angles over every 8-degree sector. For the labels, we used the ArcCheck-based  
136 percentage gamma pass rate of each arc obtained as part of the standard PSQA process in  
137 our clinic. To obtain the gamma pass rates, we parsed the ArcCheck-generated PDF reports  
138 corresponding to each patient using the PyPDF2<sup>‡</sup> Python package. As the result, we obtained  
139 a tabular regression dataset with 360 purely numerical features and 1873 samples.

140 For our ultimate goal of PSQA failure prediction, we consider the same data in the  
141 classification context by thresholding the regression labels and converting them into binary  
142 classification labels. We defined the action threshold level in the gamma analysis to be at  
143 95 % as is common in clinical practice<sup>39,40,41</sup> and obtained binary classification labels (pass

---

\*RaySearch Laboratories

†Sun Nuclear corporation

‡<https://pypi.org/project/PyPDF2/>

144 or fail) based on this threshold. We reserved 65% of the samples for the training set, 15%  
145 for the validation set and 20% for the test set. To pre-process the data, we normalized the  
146 features and regression targets by subtracting their mean over the training set and dividing  
147 by their standard deviation over the training set.

## 148 II.B. Transformer-based tabular deep learning model

149 **Background of machine learning models for tabular data.** Gradient boosted de-  
150 cision trees (GBDT)<sup>36,37,42,43</sup> are the traditionally dominant machine learning approaches  
151 for tabular data. These models are commonly used in practice and widely deployed in  
152 industry in various domains<sup>44</sup>. Although numerous models have been proposed based on  
153 using differentiable ensembles<sup>45,46,47,48,49</sup>, leveraging attention-based transformer neural net-  
154 works<sup>35,50,51,52,53,54</sup>, as well as other approaches<sup>55,56,57,58,59,60</sup>, recent work on systematic eval-  
155 uation of deep tabular models<sup>35,44</sup> shows that there is no universally best model capable of  
156 consistently outperforming GBDT. Transformer-based models have been shown to be the  
157 strongest competitor of GBDT<sup>35,50,54,61,62</sup>, especially when coupled with a powerful hyper-  
158 parameter tuning toolkit<sup>35,63</sup>.

159 **Tabular transformer model.** We employ the recent transformer-based tabular deep  
160 learning method FT-Transformer proposed by Gorishniy *et al.*<sup>35</sup> which has been shown  
161 to be the strongest neural network approach in the tabular data domain<sup>35,61</sup>. Additionally,  
162 we compare the performance of our model with the gradient boosted decision trees, and we  
163 use the popular CatBoost<sup>36</sup> and XGBoost<sup>37</sup> packages.

164 **Evaluation of model performance.** We evaluate the models in the regression context  
165 of predicting the gamma pass rates as well as in the classification context of predicting the  
166 PSQA plan failures. In the regression context, we use mean absolute error (MAE) and  
167 root mean squared error (RMSE) metrics as well as Pearson's and Spearman's correlation  
168 coefficients between the predictions and the ground truth gamma pass rate values. In the  
169 classification context, we use the receiver operating characteristic (ROC) area under the  
170 curve (AUC) to evaluate the model performance. We report the beam-level ROC AUC and  
171 patient-level ROC AUC. The patient-level predictions and labels are obtained by converting

172 the beam-level predictions and labels such that a plan is labeled as fail if at least one beam  
173 in the plan failed QA. In the classification context we also evaluate the performance of a  
174 non-learned baseline approach based on the average MLC gap<sup>15</sup> for comparison.

175 **Hyperparameter tuning.** We use the Optuna Bayesian optimization toolkit<sup>63</sup> for hy-  
176 perparameter tuning. The hyperparameter search spaces for each model are reported in  
177 Appendix A. To avoid overfitting, we use early stopping with patience for each model, i.e.,  
178 we stop training the models if no improvement in the validation score is observed for 30  
179 epochs with FT-Transformer or for 50 boosting rounds with CatBoost and XGBoost.

### 180 III. Results

181 In this section we present the performance of the FT-Transformer model and compare it to  
182 the gradient boosted decision trees as well as to the non-learned mean-MLC-gap complexity  
183 metric baseline. We investigate the model performance both on the regression task of pre-  
184 dicting the ArcCHECK gamma pass rates and the classification task of predicting the QA  
185 failure.

186 **Regression results.** We first present the performance of all models in predicting the  
187 gamma pass rates in Table 1. For each model we present four regression performance metrics:  
188 mean absolute error (MAE), root mean squared error (RMSE), Pearson's  $r$  and Spearman's  
189  $r$  correlation coefficients. FT-Transformer offers competitive performance with CatBoost  
190 and XGBoost and all models achieve good results, with e.g. MAE of the gamma rate  
191 predictions between 1.4% and 1.53%. The MAE, RMSE, Pearson's  $r$  and Spearman's  $r$   
192 values are consistent and are on the same order with the results of other studies in the  
193 literature<sup>21,22,23,28,32</sup> even though they are not directly comparable given the differences in  
194 the experimental setups due to the varying hospital equipment and PSQA processes.

195 **Classification results.** The ultimate clinical utility of our models is predicting the PSQA  
196 failures to reduce the patient treatment delays and the load on the hospital resources. This  
197 practical setup is best emulated by considering our models in the classification context.  
198 However, training the models using the regression labels instead of the classification labels



Table 1: **Regression results.** Rows correspond to models and columns correspond to regression metrics.

|                | MAE (%) | RMSE (%) | Pearson's $r$ | Spearman's $r$ |
|----------------|---------|----------|---------------|----------------|
| FT-Transformer | 1.44    | 1.95     | 0.51          | 0.51           |
| XGBoost        | 1.53    | 1.89     | 0.58          | 0.59           |
| CatBoost       | 1.40    | 1.84     | 0.6           | 0.59           |

199 directly allows us to leverage more fine-grained target information and avoid the challenges  
200 of severe class imbalance in the classification labels. Nonetheless, the predictions of our  
201 regression models could be evaluated in the classification context and we present these results  
202 in Table 2. We highlight that Table 2 shows two types of ROC AUC metrics: beam-level and  
203 patient-level. As mentioned in section II.B., the patient-level predictions are formed from  
204 the beam-level predictions by considering a patient plan to be failed if at least one of the  
beams in the plan is failed.

Table 2: **Classification results.** Rows correspond to models and columns correspond to classification metrics.

|                       | Beam-level ROC AUC | Patient-level ROC AUC |
|-----------------------|--------------------|-----------------------|
| FT-Transformer        | 0.82               | 0.85                  |
| XGBoost               | 0.87               | 0.87                  |
| CatBoost              | 0.86               | 0.87                  |
| Mean MLC Gap Baseline | 0.71               | 0.72                  |

205  
206 As the main takeaways of Table 2, we observe that the patient-level ROC AUC classifi-  
207 cation performance of FT-Transformer is very close to that of CatBoost and XGBoost and  
208 that all of the machine learning approaches significantly outperform the Mean-MLC-Gap  
209 baseline.

210 While ROC AUC summarizes the classification performance for all of the prediction  
211 thresholds, a particular threshold has to be selected in practice. To investigate this, we  
212 further report the patient-level ROC curves for each of the machine learning models in  
213 Figure 1. Since missing a failed plan results in patient rescheduling, it is more costly than  
214 sending a successful plan for replanning. Therefore, in our clinical scenario it is beneficial to  
215 maximize the true positive rate of PSQA failure identification while keeping the false positive  
216 rate at a reasonable value. From the shape of the ROC curves in Figure 1, we observe that

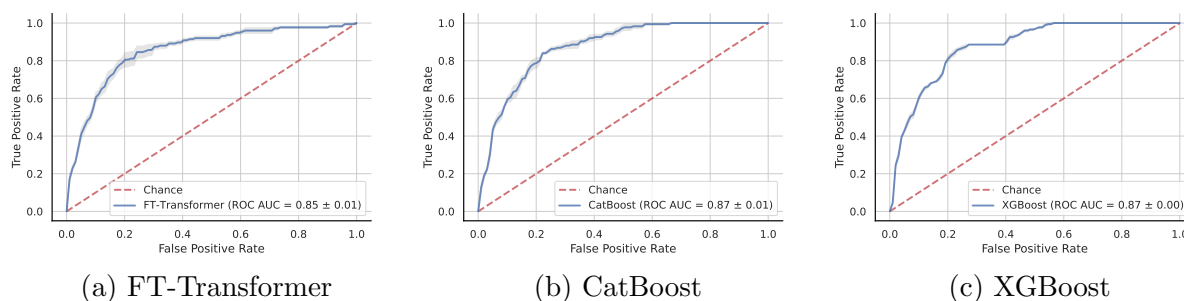

Figure 1: **Patient-level ROC curves.** (a) FT-Transformer (b) CatBoost (c) XGBoost. The error bars represent the standard error across 5 seeds. The positive label corresponds to plan failure.

217 FT-Transformer, CatBoost, and XGBoost serve this purpose well and all allow to achieve  
218 80% true positive rate while keeping the false positive rate under 20%.

## 219 IV. Discussion

220 We demonstrated that PSQA failure prediction is feasible using just the MLC leaf position  
221 data without feature engineering. We evaluated the FT transformer model in both regression  
222 and classification contexts and found that it outperforms the non-learned model with a mean  
223 MLC gap complexity metric, and performs similarly with the two leading gradient boosted  
224 decision tree models, CatBoost and XGBoost. The FT-Transformer neural network model,  
225 CatBoost, and XGBoost all provide a substantial improvement over the complexity-metric-  
226 based baseline. However, the FT-Transformer model comes with a benefit of being end-  
227 to-end differentiable, providing a differentiable map from MLC positions to the probability  
228 of PSQA failure. Therefore, this model could be leveraged as a differentiable regularizer  
229 that allows gradient-based leaf sequencing optimization algorithms to produce a deliverable  
230 treatment plan that is likely to pass PSQA.

231 It is challenging to directly compare models across different studies due to the lack of  
232 existing benchmark datasets and there being numerous combinations of TPS, beam models,  
233 linear accelerators, MLC designs, and PSQA procedures, all of which can affect the perfor-  
234 mance, making apple-to-apple comparison difficult. However, we note that our results are  
235 consistent with the performance published in the literature<sup>21,22,23,28,32</sup>. Our models achieve  
236 classification performance of 0.85-0.87 ROC AUC and are able to identify 80% of treatment

237 plans that would have failed the PSQA while sending for replanning only up to 20% of  
238 successful plans. Using these models in clinical practice can substantially reduce the need  
239 for replanning and possibly rescheduling patient due to PSQA failure, which imposes extra  
240 workload and stress, and can ultimately compromise patient safety.

241 Our work was motivated by recognizing the correlation between MLC related complexity  
242 metrics and PSQA failures. This leads to the idea of improving leaf sequencing algorithms  
243 to produce MLC movements that are more likely to pass PSQA to begin with, which we  
244 believe is an improvement from the previous efforts to reduce the frequency of replanning  
245 and redoing PSQA by identifying a treatment plan that is likely to fail in the upstream of  
246 the workflow, i.e., prior to doing PSQA. We successfully built a model to predict PSQA  
247 failure solely based on MLC and jaw positions exploiting recent advances in tabular machine  
248 learning models. Incorporating FT-Transformer model in the leaf sequencing algorithms to  
249 estimate the potential reduction in the PSQA failure probability of the resulting plans is left  
250 for future work.

## 251 V. Conclusion

252 In this work we applied the leading tabular machine learning approaches to the problem of  
253 PSQA failure prediction based solely on MLC leaf positions, and obtained effective models  
254 which have both direct clinical practice impact to reduce the PSQA failure as well as potential  
255 to improve MLC leaf sequencing algorithms to produce treatment plans that are more likely  
256 to pass PSQA.

## 257 VI. Conflict of Interest Statement

258 The authors have no relevant conflicts of interest to disclose.

---

## References

259

260

261 <sup>1</sup> J. R. Palta, T. R. Mackie, and R. Lee, Intensity-modulated radiation therapy state of  
262 the art, in *Proceedings of the Korean Society of Medical Physics Conference*, pages 4–4,  
263 Korean Society of Medical Physics, 2006.

264 <sup>2</sup> C. Yu, D. Yan, M. Du, S. Zhou, and L. Verhey, Optimization of leaf positions when  
265 shaping a radiation field with a multileaf collimator, *Physics in Medicine & Biology* **40**,  
266 305 (1995).

267 <sup>3</sup> T. Long, M. Chen, S. Jiang, and W. Lu, Continuous leaf optimization for IMRT leaf  
268 sequencing, *Medical Physics* **43**, 5403–5411 (2016).

269 <sup>4</sup> A. Cassioli and J. Unkelbach, Aperture shape optimization for IMRT treatment plan-  
270 ning, *Physics in Medicine & Biology* **58**, 301 (2012).

271 <sup>5</sup> D. M. Shepard, M. A. Earl, X. A. Li, S. Naqvi, and C. Yu, Direct aperture optimization:  
272 a turnkey solution for step-and-shoot IMRT, *Medical physics* **29**, 1007–1018 (2002).

273 <sup>6</sup> D. A. Granville, J. G. Sutherland, J. G. Belec, and D. J. La Russa, Predicting VMAT  
274 patient-specific QA results using a support vector classifier trained on treatment plan  
275 characteristics and linac QC metrics, *Physics in Medicine & Biology* **64**, 095017 (2019).

276 <sup>7</sup> M. Earl, M. Afghan, C. Yu, Z. Jiang, and D. Shepard, Jaws-only IMRT using direct  
277 aperture optimization, *Medical physics* **34**, 307–314 (2007).

278 <sup>8</sup> B. Hardemark, A. Liander, H. Rehbinder, and J. Löf, Direct machine parameter opti-  
279 mization with RayMachine in Pinnacle, Ray-Search White Paper (2003).

280 <sup>9</sup> T. LoSasso, C.-S. Chui, and C. C. Ling, Comprehensive quality assurance for the delivery  
281 of intensity modulated radiotherapy with a multileaf collimator used in the dynamic  
282 mode, *Medical physics* **28**, 2209–2219 (2001).

283 <sup>10</sup> G. A. Ezzell, J. M. Galvin, D. Low, J. R. Palta, I. Rosen, M. B. Sharpe, P. Xia, Y. Xiao,  
284 L. Xing, and C. X. Yu, Guidance document on delivery, treatment planning, and clinical

- 285 implementation of IMRT: report of the IMRT Subcommittee of the AAPM Radiation  
286 Therapy Committee, *Medical physics* **30**, 2089–2115 (2003).
- 287 <sup>11</sup> D. A. Low, J. M. Moran, J. F. Dempsey, L. Dong, and M. Oldham, Dosimetry tools  
288 and techniques for IMRT, *Medical physics* **38**, 1313–1338 (2011).
- 289 <sup>12</sup> D. A. Low, W. B. Harms, S. Mutic, and J. A. Purdy, A technique for the quantitative  
290 evaluation of dose distributions, *Medical physics* **25**, 656–661 (1998).
- 291 <sup>13</sup> D. A. Low and J. F. Dempsey, Evaluation of the gamma dose distribution comparison  
292 method, *Medical physics* **30**, 2455–2464 (2003).
- 293 <sup>14</sup> K. C. Younge, D. Roberts, L. A. Janes, C. Anderson, J. M. Moran, and M. M. Matuszak,  
294 Predicting deliverability of volumetric-modulated arc therapy (VMAT) plans using aper-  
295 ture complexity analysis, *Journal of applied clinical medical physics* **17**, 124–131 (2016).
- 296 <sup>15</sup> S. Crowe, T. Kairn, N. Middlebrook, B. Sutherland, B. Hill, J. Kenny, C. M. Langton,  
297 and J. Trapp, Examination of the properties of IMRT and VMAT beams and evaluation  
298 against pre-treatment quality assurance results, *Physics in Medicine & Biology* **60**, 2587  
299 (2015).
- 300 <sup>16</sup> J. M. Park, S.-Y. Park, H. Kim, J. H. Kim, J. Carlson, and S.-J. Ye, Modulation indices  
301 for volumetric modulated arc therapy, *Physics in Medicine & Biology* **59**, 7315 (2014).
- 302 <sup>17</sup> S. Crowe, T. Kairn, J. Kenny, R. Knight, B. Hill, C. M. Langton, and J. Trapp, Treat-  
303 ment plan complexity metrics for predicting IMRT pre-treatment quality assurance re-  
304 sults, *Australasian physical & engineering sciences in medicine* **37**, 475–482 (2014).
- 305 <sup>18</sup> L. Masi, R. Doro, V. Favuzza, S. Cipressi, and L. Livi, Impact of plan parameters on the  
306 dosimetric accuracy of volumetric modulated arc therapy, *Medical physics* **40**, 071718  
307 (2013).
- 308 <sup>19</sup> J. Park, H. Wu, J. Kim, J. Carlson, and K. Kim, The effect of MLC speed and accel-  
309 eration on the plan delivery accuracy of VMAT, *The British journal of radiology* **88**,  
310 20140698 (2015).
-

- 311 <sup>20</sup> M. Antoine, F. Ralite, C. Soustiel, T. Marsac, P. Sargos, A. Cugny, and J. Caron, Use of  
312 metrics to quantify IMRT and VMAT treatment plan complexity: A systematic review  
313 and perspectives, *Physica Medica* **64**, 98–108 (2019).
- 314 <sup>21</sup> J. Li, L. Wang, X. Zhang, L. Liu, J. Li, M. F. Chan, J. Sui, and R. Yang, Machine  
315 learning for patient-specific quality assurance of VMAT: prediction and classification  
316 accuracy, *International Journal of Radiation Oncology\* Biology\* Physics* **105**, 893–902  
317 (2019).
- 318 <sup>22</sup> L. Wang, J. Li, S. Zhang, X. Zhang, Q. Zhang, M. F. Chan, R. Yang, and J. Sui, Multi-  
319 task autoencoder based classification-regression model for patient-specific VMAT QA,  
320 *Physics in Medicine & Biology* **65**, 235023 (2020).
- 321 <sup>23</sup> H. Hirashima, T. Ono, M. Nakamura, Y. Miyabe, N. Mukumoto, H. Iramina, and T. Mi-  
322 zowaki, Improvement of prediction and classification performance for gamma passing  
323 rate by using plan complexity and dosimetrics features, *Radiotherapy and Oncology* **153**,  
324 250–257 (2020).
- 325 <sup>24</sup> R. Yang et al., Commissioning and clinical implementation of an Autoencoder based  
326 Classification-Regression model for VMAT patient-specific QA in a multi-institution  
327 scenario, *Radiotherapy and Oncology* **161**, 230–240 (2021).
- 328 <sup>25</sup> J. C. Lizar, C. C. Yaly, A. C. Bruno, G. A. Viani, and J. F. Pavoni, Patient-specific  
329 IMRT QA verification using machine learning and gamma radiomics, *Physica Medica*  
330 **82**, 100–108 (2021).
- 331 <sup>26</sup> T. Kairn, S. Crowe, J. Kenny, R. Knight, and J. Trapp, Predicting the likelihood of QA  
332 failure using treatment plan accuracy metrics, in *Journal of Physics: Conference Series*,  
333 volume 489, page 012051, IOP Publishing, 2014.
- 334 <sup>27</sup> T. Kusunoki, S. Hatanaka, M. Hariu, Y. Kusano, D. Yoshida, H. Katoh, M. Shimbo,  
335 and T. Takahashi, Evaluation of prediction and classification performances in different  
336 machine learning models for patient-specific quality assurance of head-and-neck VMAT  
337 plans, *Medical physics* **49**, 727–741 (2022).
-

- 338 28 D. Lam, X. Zhang, H. Li, Y. Deshan, B. Schott, T. Zhao, W. Zhang, S. Mutic, and  
339 B. Sun, Predicting gamma passing rates for portal dosimetry-based IMRT QA using  
340 machine learning, *Medical physics* **46**, 4666–4675 (2019).
- 341 29 S. Thongsawad, S. Srisatit, and T. Fuangrod, Predicting gamma evaluation results of  
342 patient-specific head and neck volumetric-modulated arc therapy quality assurance based  
343 on multileaf collimator patterns and fluence map features: A feasibility study, *Journal*  
344 *of Applied Clinical Medical Physics*, e13622 (2022).
- 345 30 Y. Kimura, N. Kadoya, Y. Oku, T. Kajikawa, S. Tomori, and K. Jingu, Error detec-  
346 tion model developed using a multi-task convolutional neural network in patient-specific  
347 quality assurance for volumetric-modulated arc therapy, *Medical Physics* **48**, 4769–4783  
348 (2021).
- 349 31 Y. Huang et al., Virtual Patient-Specific Quality Assurance of IMRT Using UNet++:  
350 Classification, Gamma Passing Rates Prediction, and Dose Difference Prediction, *Frontiers in Oncology*,  
351 2798 (2021).
- 352 32 S. Tomori, N. Kadoya, T. Kajikawa, Y. Kimura, K. Narazaki, T. Ochi, and K. Jingu,  
353 Systematic method for a deep learning-based prediction model for gamma evaluation in  
354 patient-specific quality assurance of volumetric modulated arc therapy, *Medical Physics*  
355 **48**, 1003–1018 (2021).
- 356 33 T. Matsuura, D. Kawahara, A. Saito, H. Miura, K. Yamada, S. Ozawa, and Y. Nagata,  
357 Predictive gamma passing rate of 3D detector array-based volumetric modulated arc  
358 therapy quality assurance for prostate cancer via deep learning, (2022).
- 359 34 S. Tomori, N. Kadoya, Y. Takayama, T. Kajikawa, K. Shima, K. Narazaki, and K. Jingu,  
360 A deep learning-based prediction model for gamma evaluation in patient-specific quality  
361 assurance, *Medical physics* **45**, 4055–4065 (2018).
- 362 35 Y. Gorishniy, I. Rubachev, V. Khrulkov, and A. Babenko, Revisiting Deep Learning  
363 Models for Tabular Data, arXiv preprint arXiv:2106.11959 (2021).
- 364 36 L. Prokhorenkova, G. Gusev, A. Vorobev, A. V. Dorogush, and A. Gulin, CatBoost:  
365 unbiased boosting with categorical features, *Advances in neural information processing*  
366 *systems* **31** (2018).
-

- 367 <sup>37</sup> T. Chen and C. Guestrin, Xgboost: A scalable tree boosting system, in *Proceedings of*  
368 *the 22nd acm sigkdd international conference on knowledge discovery and data mining*,  
369 pages 785–794, 2016.
- 370 <sup>38</sup> M. Y. Law and B. Liu, DICOM-RT and its utilization in radiation therapy, *Radiograph-*  
371 *ics* **29**, 655–667 (2009).
- 372 <sup>39</sup> G. H. Chan, L. C. Chin, A. Abdellatif, J.-P. Bissonnette, L. Buckley, D. Comsa,  
373 D. Granville, J. King, P. L. Rapley, and A. Vandermeer, Survey of patient-specific  
374 quality assurance practice for IMRT and VMAT, *Journal of Applied Clinical Medical*  
375 *Physics* **22**, 155–164 (2021).
- 376 <sup>40</sup> Y. Pan, R. Yang, S. Zhang, J. Li, J. Dai, J. Wang, and J. Cai, National survey of patient  
377 specific IMRT quality assurance in China, *Radiation Oncology* **14**, 1–10 (2019).
- 378 <sup>41</sup> H. Mehrens, P. Taylor, D. S. Followill, and S. F. Kry, Survey results of 3D-CRT and  
379 IMRT quality assurance practice, *Journal of applied clinical medical physics* **21**, 70–76  
380 (2020).
- 381 <sup>42</sup> J. H. Friedman, Greedy function approximation: a gradient boosting machine, *Annals*  
382 *of statistics* , 1189–1232 (2001).
- 383 <sup>43</sup> G. Ke, Q. Meng, T. Finley, T. Wang, W. Chen, W. Ma, Q. Ye, and T.-Y. Liu, Light-  
384 gbm: A highly efficient gradient boosting decision tree, *Advances in neural information*  
385 *processing systems* **30** (2017).
- 386 <sup>44</sup> R. Shwartz-Ziv and A. Armon, Tabular data: Deep learning is not all you need, *Infor-*  
387 *mation Fusion* **81**, 84–90 (2022).
- 388 <sup>45</sup> S. Popov, S. Morozov, and A. Babenko, Neural oblivious decision ensembles for deep  
389 learning on tabular data, arXiv preprint arXiv:1909.06312 (2019).
- 390 <sup>46</sup> H. Hazimeh, N. Ponomareva, P. Mol, Z. Tan, and R. Mazumder, The tree ensemble  
391 layer: Differentiability meets conditional computation, in *International Conference on*  
392 *Machine Learning*, pages 4138–4148, PMLR, 2020.
- 393 <sup>47</sup> Y. Yang, I. G. Morillo, and T. M. Hospedales, Deep neural decision trees, arXiv preprint  
394 arXiv:1806.06988 (2018).
-



- 395 <sup>48</sup> P. Kotschieder, M. Fiterau, A. Criminisi, and S. R. Buló, Deep neural decision forests,  
396 in *Proceedings of the IEEE international conference on computer vision*, pages 1467–  
397 1475, 2015.
- 398 <sup>49</sup> S. Badirli, X. Liu, Z. Xing, A. Bhowmik, K. Doan, and S. S. Keerthi, Gradient boosting  
399 neural networks: Grownnet, arXiv preprint arXiv:2002.07971 (2020).
- 400 <sup>50</sup> G. Somepalli, M. Goldblum, A. Schwarzschild, C. B. Bruss, and T. Goldstein, SAINT:  
401 Improved Neural Networks for Tabular Data via Row Attention and Contrastive Pre-  
402 Training, arXiv preprint arXiv:2106.01342 (2021).
- 403 <sup>51</sup> S. O. Arik and T. Pfister, Tabnet: Attentive interpretable tabular learning, in *AAAI*,  
404 volume 35, pages 6679–6687, 2021.
- 405 <sup>52</sup> X. Huang, A. Khetan, M. Cvitkovic, and Z. Karnin, Tabtransformer: Tabular data  
406 modeling using contextual embeddings, arXiv preprint arXiv:2012.06678 (2020).
- 407 <sup>53</sup> W. Song, C. Shi, Z. Xiao, Z. Duan, Y. Xu, M. Zhang, and J. Tang, Autoint: Automatic  
408 feature interaction learning via self-attentive neural networks, in *Proceedings of the*  
409 *28th ACM International Conference on Information and Knowledge Management*, pages  
410 1161–1170, 2019.
- 411 <sup>54</sup> J. Kossen, N. Band, C. Lyle, A. N. Gomez, T. Rainforth, and Y. Gal, Self-attention  
412 between datapoints: Going beyond individual input-output pairs in deep learning, *Ad-*  
413 *vances in Neural Information Processing Systems* **34** (2021).
- 414 <sup>55</sup> R. Wang, B. Fu, G. Fu, and M. Wang, Deep & cross network for ad click predictions,  
415 in *Proceedings of the ADKDD'17*, pages 1–7, 2017.
- 416 <sup>56</sup> R. Wang, R. Shivanna, D. Cheng, S. Jain, D. Lin, L. Hong, and E. Chi, DCN V2:  
417 Improved deep & cross network and practical lessons for web-scale learning to rank  
418 systems, in *Proceedings of the Web Conference 2021*, pages 1785–1797, 2021.
- 419 <sup>57</sup> A. Beutel, P. Covington, S. Jain, C. Xu, J. Li, V. Gatto, and E. H. Chi, Latent cross:  
420 Making use of context in recurrent recommender systems, in *Proceedings of the Eleventh*  
421 *ACM International Conference on Web Search and Data Mining*, pages 46–54, 2018.
-

- 422 <sup>58</sup> G. Klambauer, T. Unterthiner, A. Mayr, and S. Hochreiter, Self-normalizing neural  
423 networks, *Advances in neural information processing systems* **30** (2017).
- 424 <sup>59</sup> J. Fiedler, Simple modifications to improve tabular neural networks, arXiv preprint  
425 arXiv:2108.03214 (2021).
- 426 <sup>60</sup> B. Schäfl, L. Gruber, A. Bitto-Nemling, and S. Hochreiter, Hopular: Modern Hopfield  
427 Networks for Tabular Data, (2021).
- 428 <sup>61</sup> Y. Gorishniy, I. Rubachev, and A. Babenko, On Embeddings for Numerical Features in  
429 Tabular Deep Learning, arXiv preprint arXiv:2203.05556 (2022).
- 430 <sup>62</sup> R. Levin, V. Cherepanova, A. Schwarzschild, A. Bansal, C. B. Bruss, T. Goldstein, A. G.  
431 Wilson, and M. Goldblum, Transfer Learning with Deep Tabular Models, arXiv preprint  
432 arXiv:2206.15306 (2022).
- 433 <sup>63</sup> T. Akiba, S. Sano, T. Yanase, T. Ohta, and M. Koyama, Optuna: A next-generation  
434 hyperparameter optimization framework, in *Proceedings of the 25th ACM SIGKDD*  
435 *international conference on knowledge discovery & data mining*, pages 2623–2631, 2019.
-

## 436 A Hyperparameter search spaces

### 437 A.1. FT-Transformer

438 The number of attention heads is always set to 8.

439

Table 3: **Optuna hyperparameter search space for FT-Transformer**

| Parameter              | Search Space                      |
|------------------------|-----------------------------------|
| Number of layers       | UniformInt[1, 4]                  |
| Feature embedding size | UniformInt[64, 512]               |
| Residual dropout       | {0, Uniform[0, 0.2]}              |
| Attention dropout      | Uniform[0, 0.5]                   |
| FFN dropout            | Uniform[0, 0.5]                   |
| FFN factor             | Uniform[2/3, 8/3]                 |
| Learning rate          | LogUniform[ $1e - 5$ , $1e - 3$ ] |
| Weight decay           | LogUniform[ $1e - 6$ , $1e - 3$ ] |

### 440 A.2. Catboost

441 The hyperparameter search space and distributions are presented in Table 4.

442

Table 4: **Optuna hyperparameter search space for Catboost**

| Parameter                  | Search Space              |
|----------------------------|---------------------------|
| Max depth                  | UniformInt[3, 10]         |
| Learning rate              | LogUniform[ $1e - 5$ , 1] |
| Bagging temperature        | Uniform[0, 1]             |
| L2 leaf reg                | LogUniform[1, 10]         |
| Leaf estimation iterations | UniformInt[1, 10]         |

### 443 A.3. XGBoost

444 The hyperparameter search space and distributions are presented in Table 5.

445

Table 5: Optuna hyperparameter search space for XGBoost

| Parameter           | Search Space                        |
|---------------------|-------------------------------------|
| Max depth           | UniformInt[3, 10]                   |
| Min child weight    | LogUniform[ $1e - 8$ , $1e5$ ]      |
| Subsample           | Uniform[0.5, 1]                     |
| Learning rate       | LogUniform[ $1e - 5$ , 1]           |
| Col sample by level | Uniform[0.5, 1]                     |
| Col sample by tree  | Uniform[0.5, 1]                     |
| Gamma               | {0, LogUniform[ $1e - 8$ , $1e2$ ]} |
| Lambda              | {0, LogUniform[ $1e - 8$ , $1e2$ ]} |
| Alpha               | {0, LogUniform[ $1e - 8$ , $1e2$ ]} |
